# Supplementary material for: Curvicollide D Isolated from the Fungus Amesia sp. Kills African Trypanosomes by Inhibiting Transcription
Source: MDPI journal article supplement (doi:10.3390/ijms23116107), 2022-05-29
Supplement: s1 [file s1]

# Curvicollide D Isolated from the Fungus *Amesia* sp. Kills African Trypanosomes by Inhibiting Transcription

Matilde Ortiz-Gonzalez <sup>1,2</sup>, Ignacio Pérez-Victoria <sup>3</sup>, Inmaculada Ramirez-Macias <sup>2,4</sup>, Nuria de Pedro <sup>3</sup>, Angel Linde-Rodriguez <sup>2,4</sup>, Víctor González-Menéndez <sup>3</sup>, Victoria Sanchez-Martin <sup>2,4</sup>, Jesús Martín <sup>3</sup>, Ana Soriano-Lerma <sup>2,5</sup>, Olga Genilloud <sup>3</sup>, Virginia Perez-Carrasco <sup>2,4</sup>, Francisca Vicente <sup>3</sup>, JoséMaceira <sup>2</sup>, Carlos A Rodríguez-Poveda <sup>2</sup>, JoséMaría Navarro-Marí, Fernando Reyes <sup>3,\*</sup>, Miguel Soriano <sup>1,2,†</sup> and Jose A. Garcia-Salcedo <sup>2,4,\*,†</sup>

- <sup>1</sup> Center for Intensive Mediterranean Agrosystems and Agri-Food Biotechnology (CIAIMBITAL), University of Almería, 04001 Almería, Spain; mog042@ual.es (M.O.-G.); msoriano@ual.es (M.S.)
  - <sup>2</sup> GENYO, Centre for Genomics and Oncological Research: Pfizer, University of Granada, Andalusian Regional Government, PTS Granada-Avenida de la Ilustración, 18016 Granada, Spain; inmaculada.ramirez@genyo.es (I.R.-M.); angel.linde@genyo.es (A.L.-R.); victoria.sanchez@genyo.es (V.S.-M.); ana.soriano@genyo.es (A.S.-L.); virginia.perez@genyo.es (V.P.-C.); pemaceira@gmail.com (J.M.); crodriguespoveda@gmail.com (C.A.R.P.)
  - <sup>3</sup> Fundación MEDINA, Centro de Excelencia en Investigación de Medicamentos Innovadores en Andalucía, Avenida del Conocimiento 34, 18016 Granada, Spain; ignacio.perez-victoria@medinaandalucia.es (I.P.-V.); ndepedro@lifelength.com (N.d.P.); victor.gonzalez@medinaandalucia.es (V.G.-M.); jesus.martin@medinaandalucia.es (J.M.); olga.genilloud@medinaandalucia.es (O.G.); francisca.vicente@medinaandalucia.es (F.V.)
  - <sup>4</sup> Microbiology Unit, Biosanitary Research Institute IBS.Granada, University Hospital Virgen de las Nieves, 18014 Granada, Spain; josem.navarro.sspa@juntadeandalucia.es
  - <sup>5</sup> Department of Physiology, Faculty of Pharmacy, Campus Universitario de Cartuja, Institute of Nutrition and Food Technology “José Mataix”, University of Granada, 18071 Granada, Spain
- \* Correspondence: fernando.reyes@medinaandalucia.es (F.R.); jags@genyo.es (J.A.G.-S.); Tel.: +34-958993965 (F.R.); +34-958715500 (J.A.G.-S.)
- † These authors contributed equally to this work.

## List of Supplementary Materials:

**Figure S1.** UV (DAD) spectrum of curvicollide D.

**Figure S2.** ESI-TOF HRMS spectrum of curvicollide D.

**Figure S3.** <sup>1</sup>H NMR spectrum, showing expanded regions, of curvicollide D (500 MHz, CDCl<sub>3</sub>, 24 °C).

**Figure S4.** <sup>13</sup>C NMR spectrum, showing expanded regions, of curvicollide D (125 MHz, CDCl<sub>3</sub>, 24 °C).

**Figure S5.** COSY spectrum of curvicollide D.

**Figure S6.** TOCSY spectrum of curvicollide D.

**Figure S7.** NOESY spectrum of curvicollide D.

**Figure S8.** Multiplicity edited HSQC spectrum of curvicollide D.

**Figure S9.** HMBC spectrum of curvicollide D.

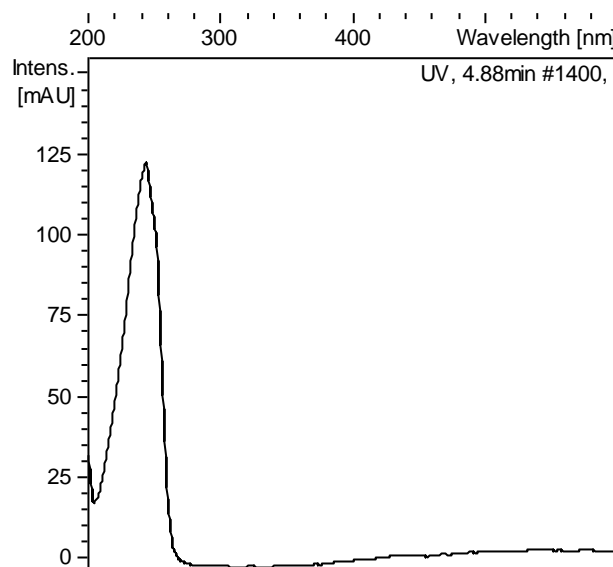

**Figure S1.** UV (DAD) spectrum of curvicolide D.

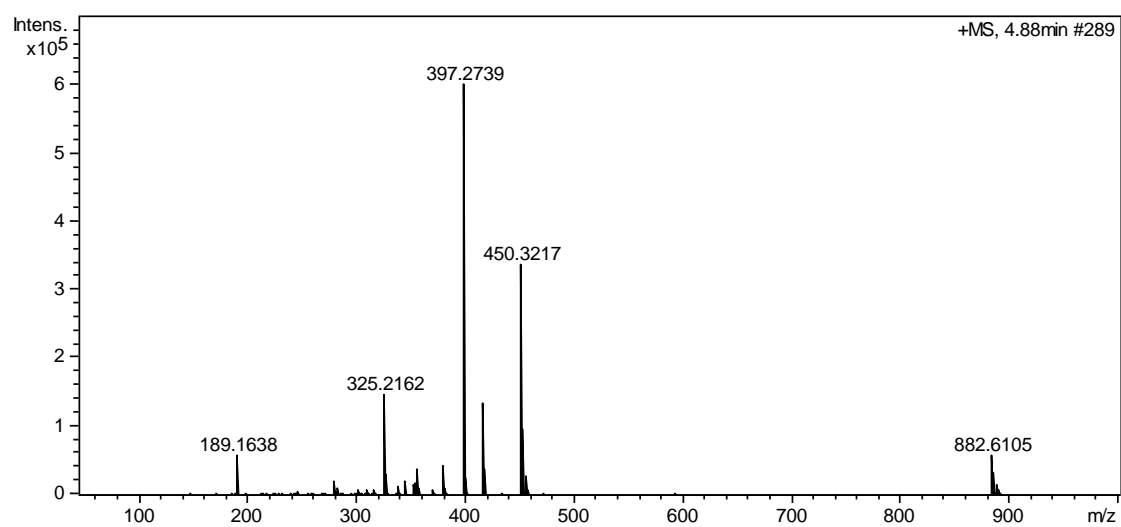

**Figure S2.** (+)-ESI-TOF HRMS spectrum of curvicolide D.

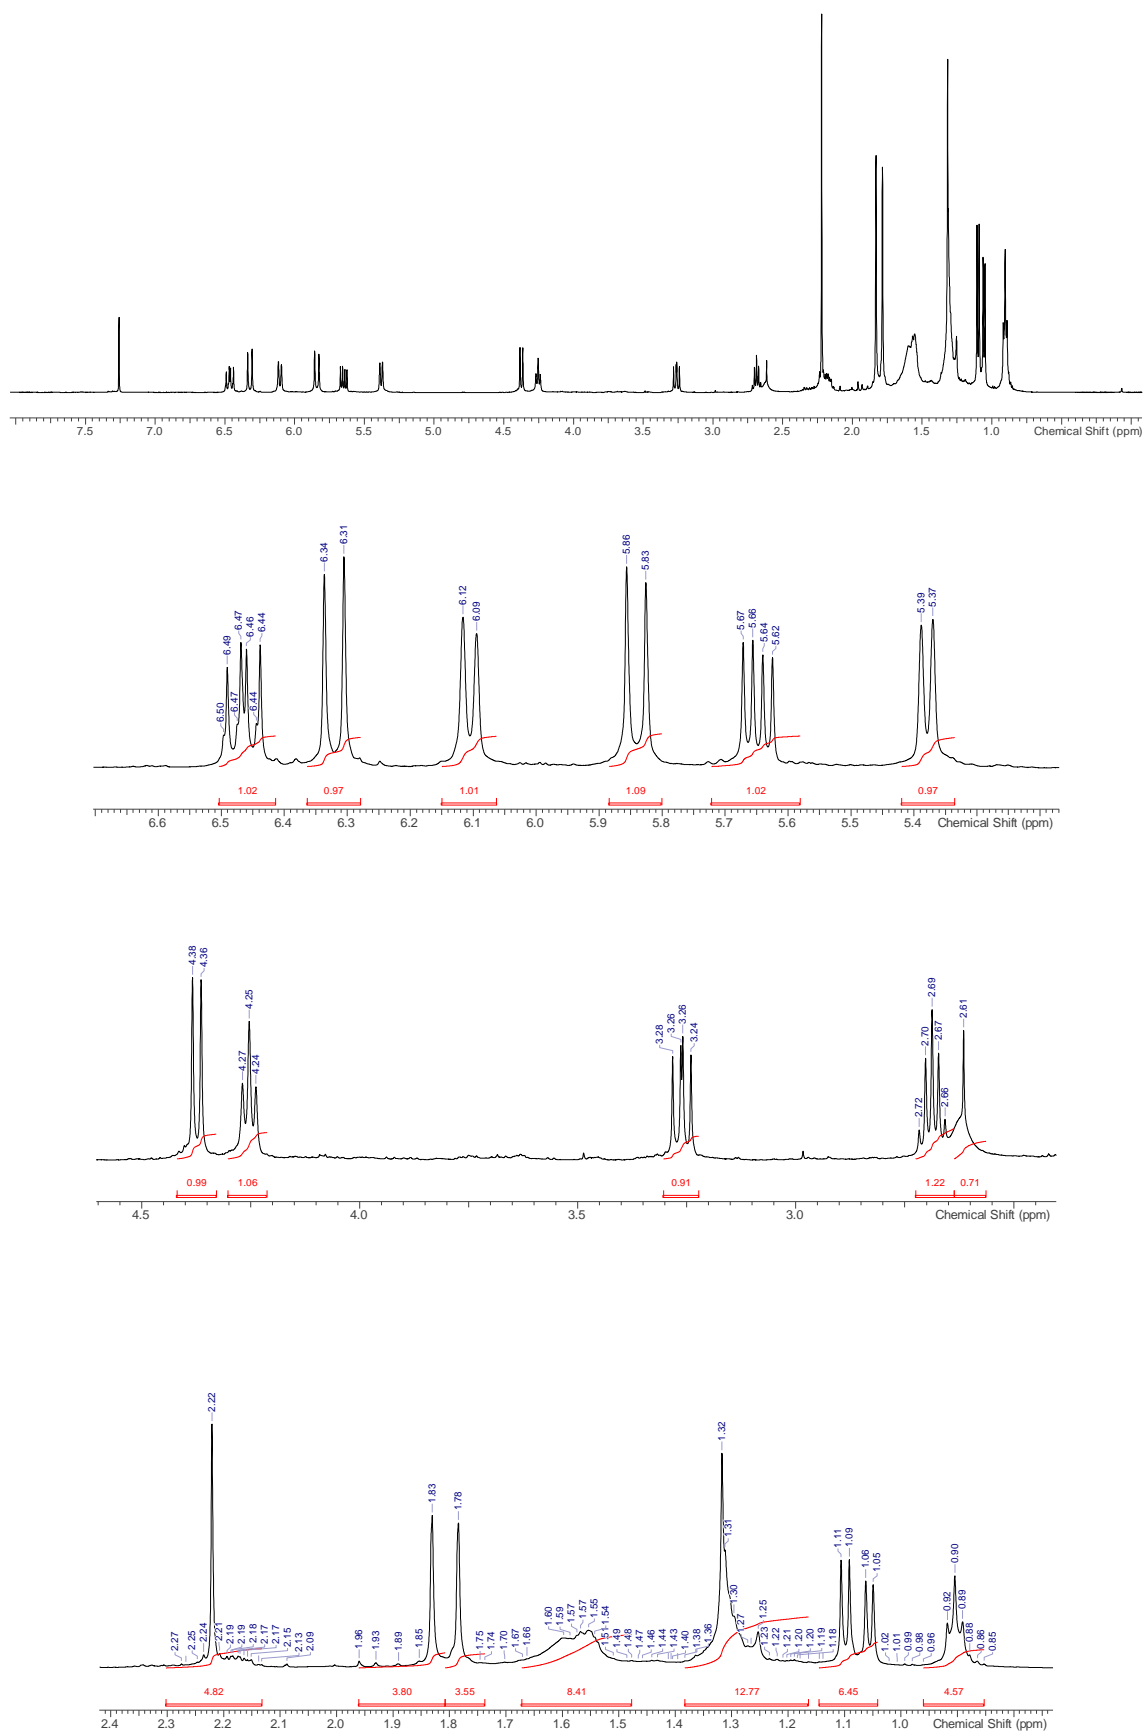

**Figure S3.**  $^1\text{H}$  NMR spectrum, showing expanded regions, of curvicolide D (500 MHz,  $\text{CDCl}_3$ , 24  $^\circ\text{C}$ ).

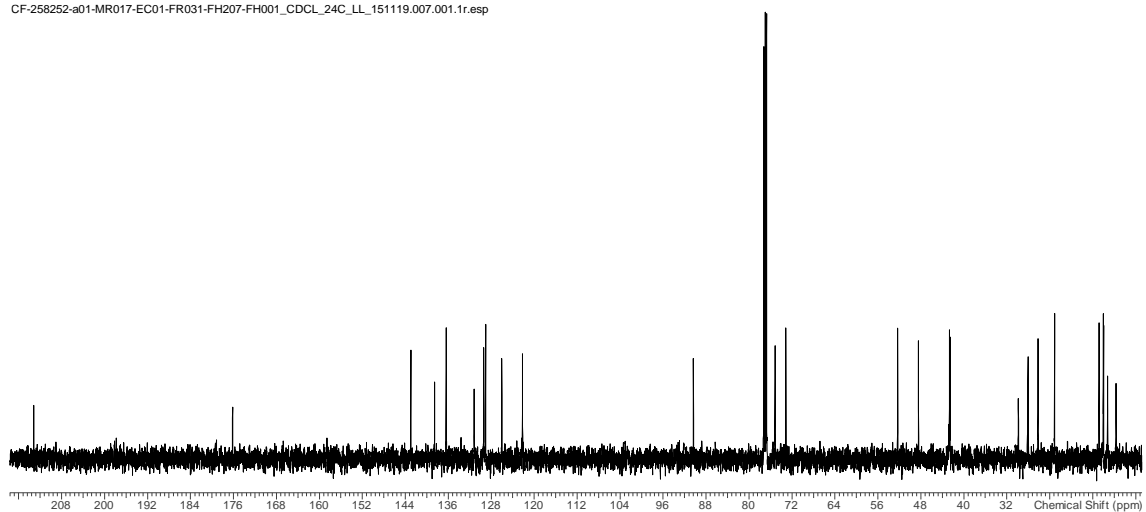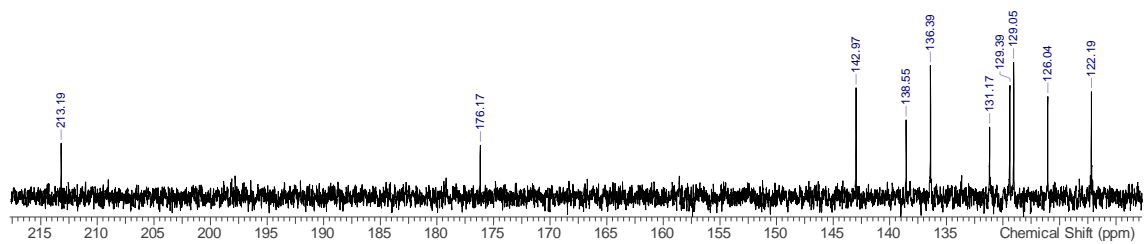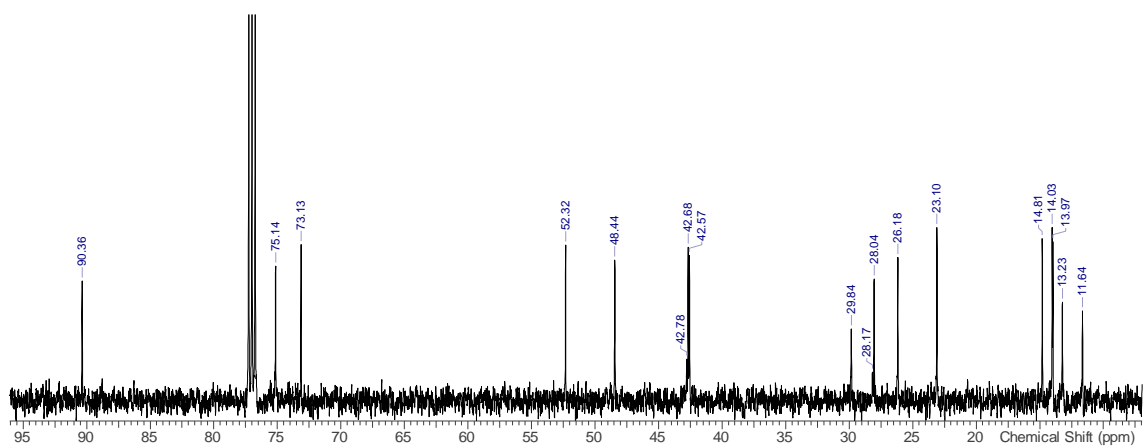

**Figure S4.**  $^{13}\text{C}$  NMR spectrum, showing expanded regions, of curvicolide D (125 MHz,  $\text{CDCl}_3$ , 24  $^\circ\text{C}$ ).

CF-258252-a01-MR017-EC01-FR031-FH207-FH001\_CDCL\_24C\_LL\_151119.002.001.2rr.esp

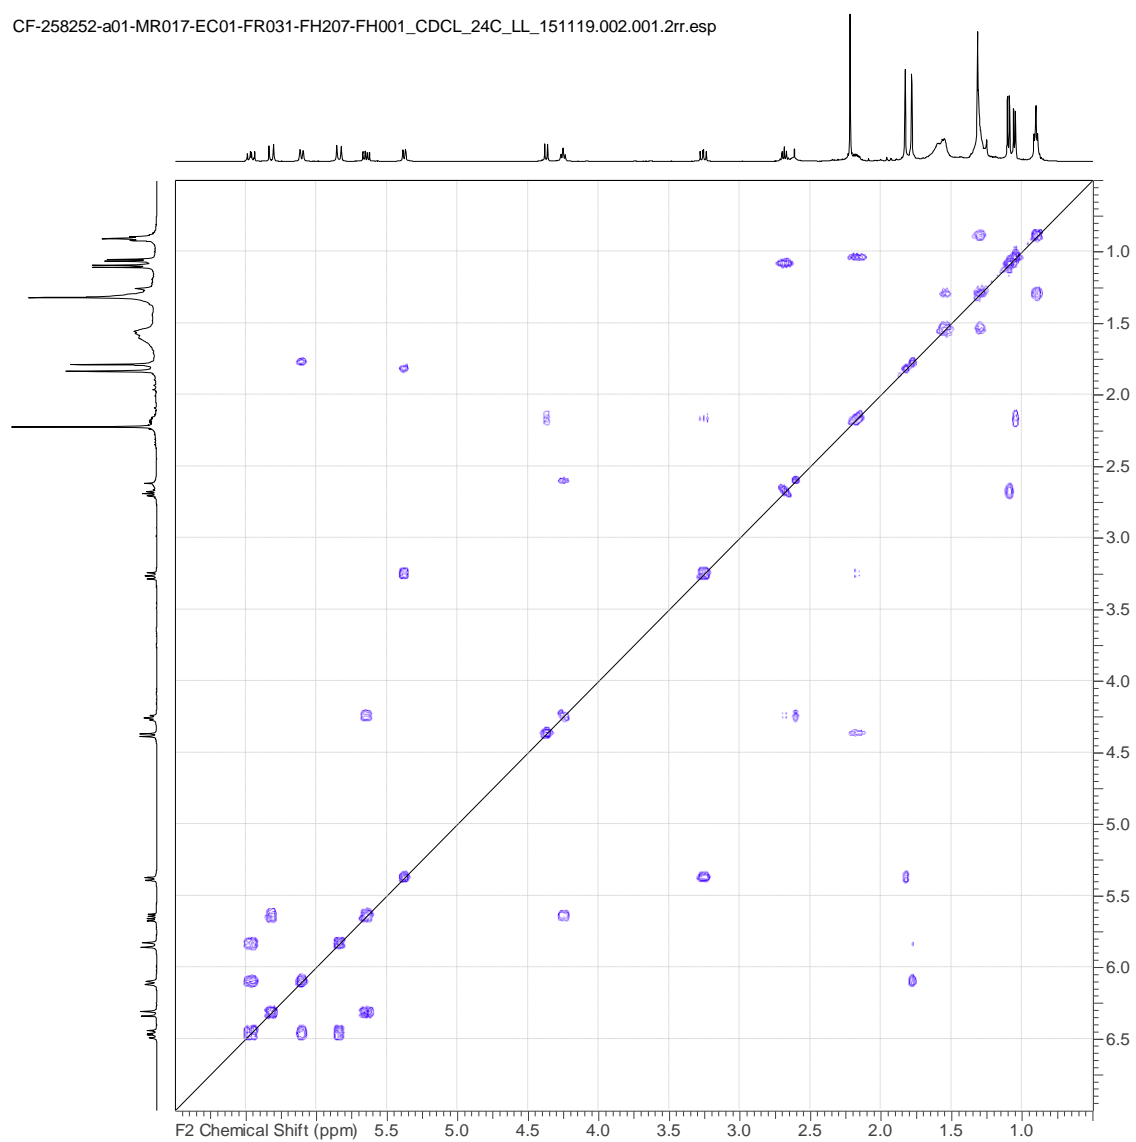

**Figure S5.** COSY spectrum of curvicolide D.

CF-258252-a01-MR017-EC01-FR031-FH207-FH001\_CDCL\_24C\_LL\_151119.003.001.2rr.esp

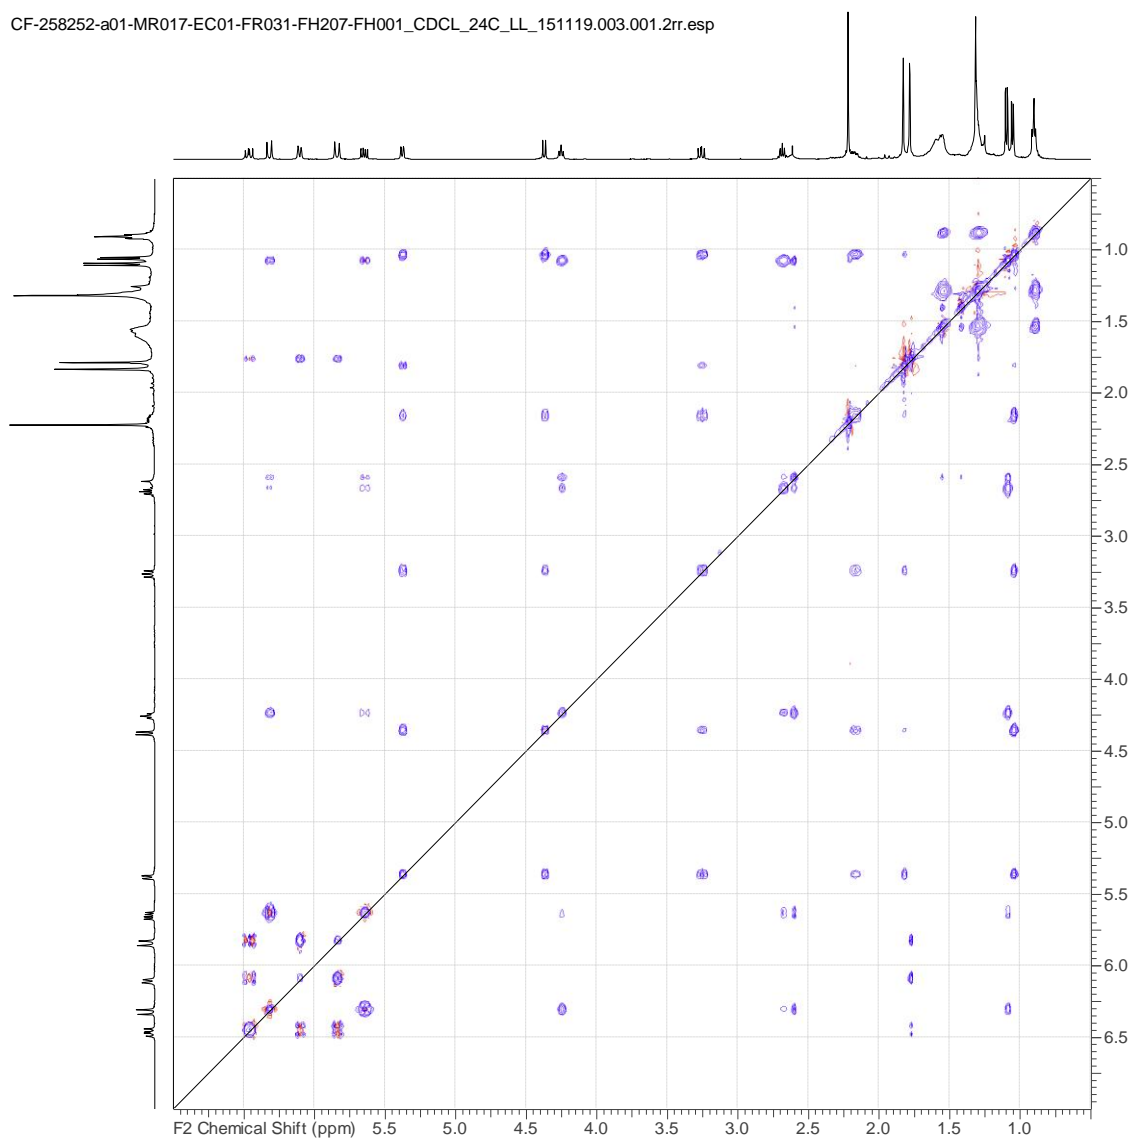

**Figure S6.** TOCSY spectrum of curvicolide D.

CF-258252-a01-MR017-EC01-FR031-FH207-FH001\_CDCL\_24C\_LL\_151119.004.001.2rr.esp

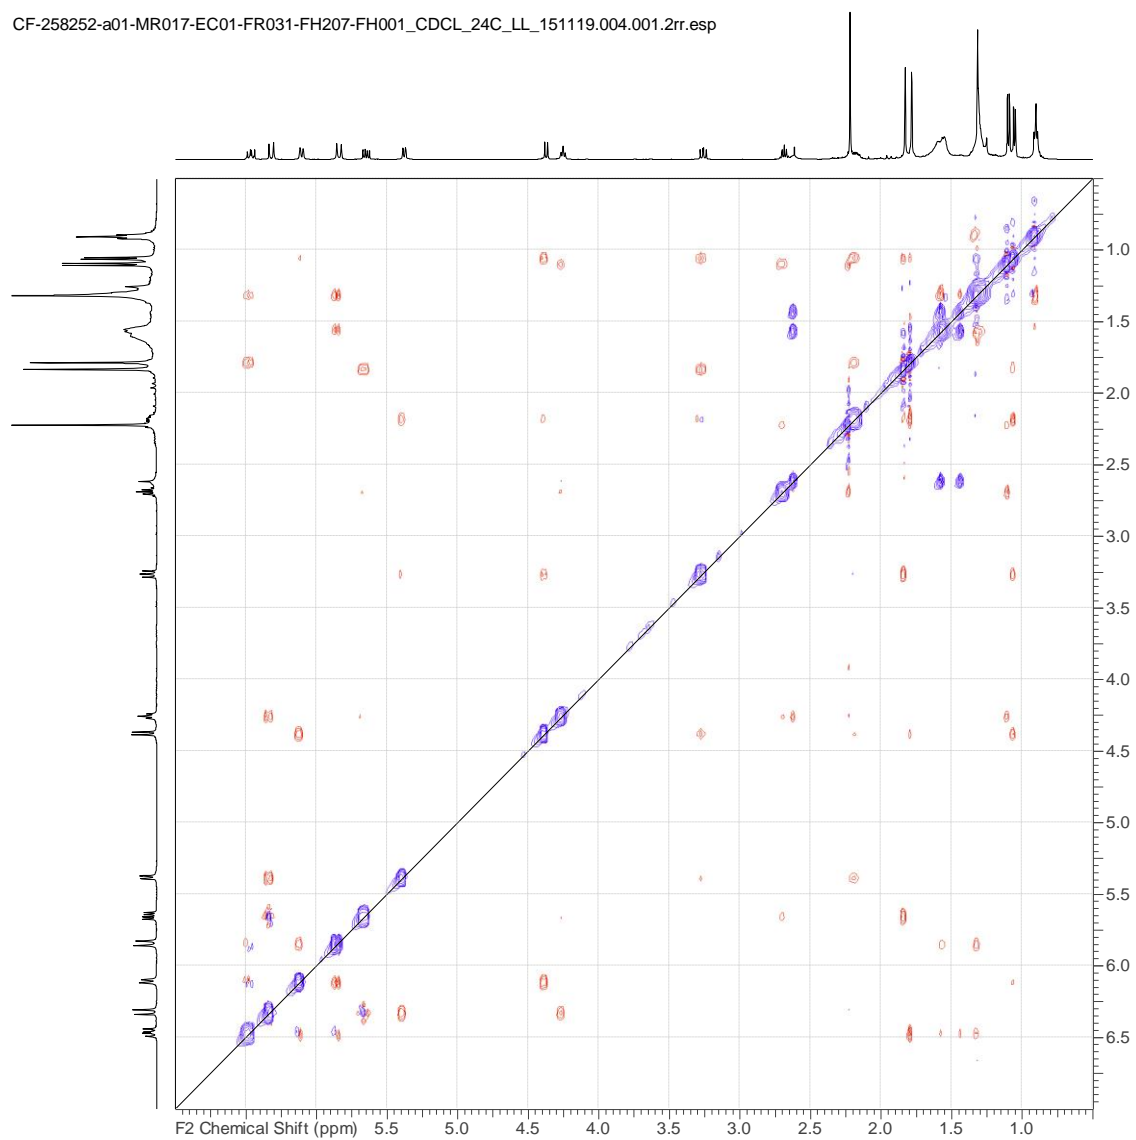

**Figure S7.** NOESY spectrum of curvicolide D.

CF-258252-a01-MR017-EC01-FR031-FH207-FH001\_CDCL\_24C\_LL\_151119.005.001.2rr.esp

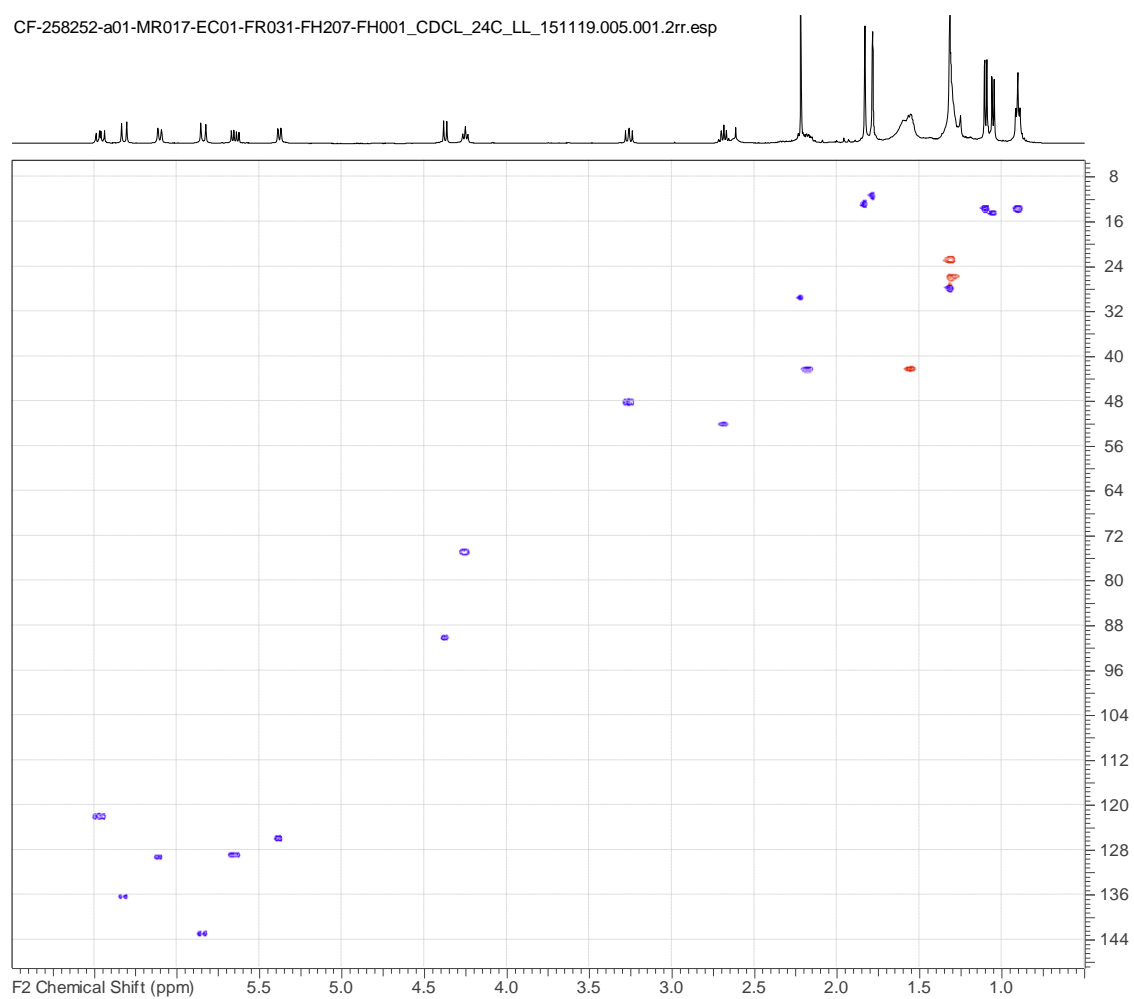

**Figure S8.** Multiplicity edited HSQC spectrum of curvicolide D.



CF-258252-a01-MR017-EC01-FR031-FH207-FH001\_CDCL\_24C\_LL\_151119.006.001.2rr.esp

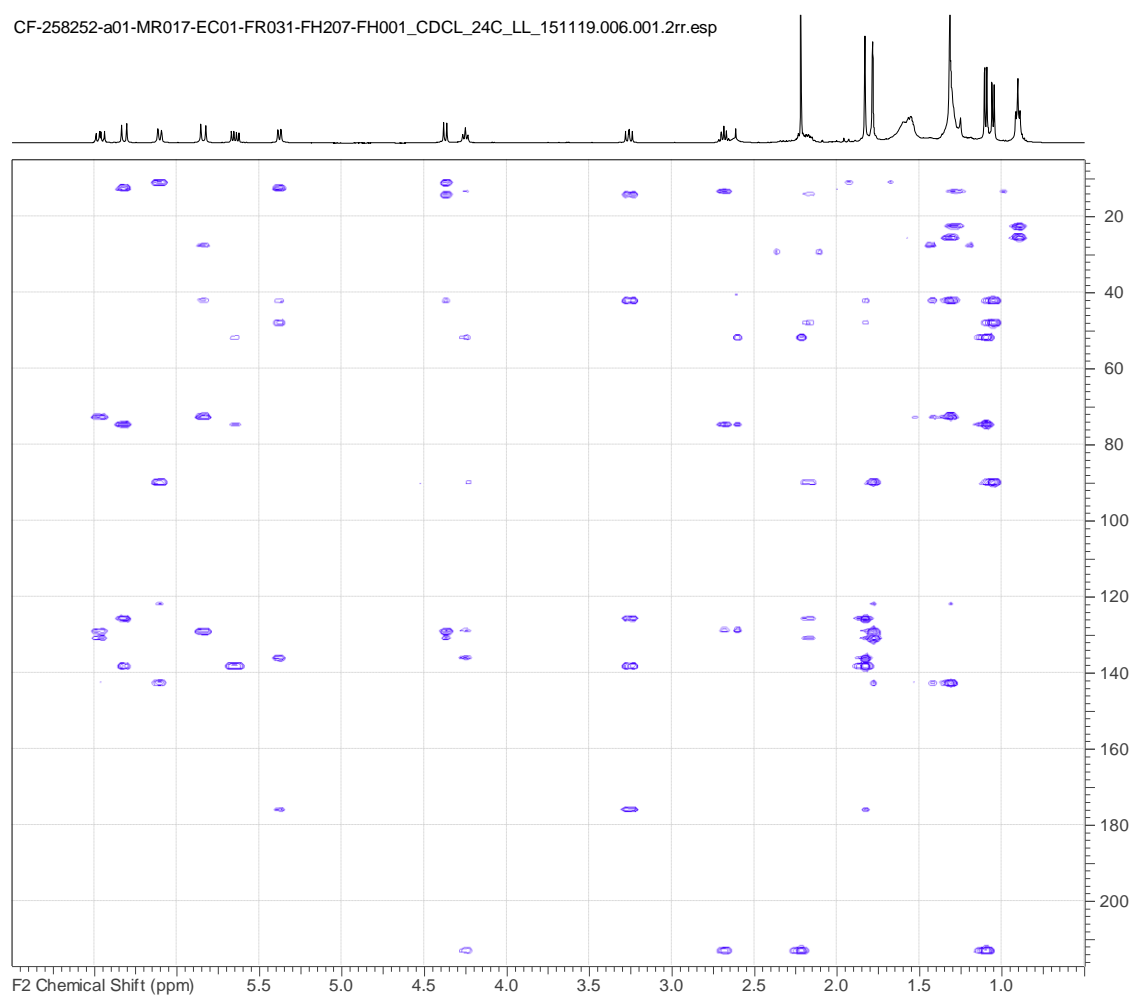

**Figure S9.** HMBC spectrum of curvicolide D.
